# Supplementary material for: Neurodivergent intersubjectivity: Distinctive features of how autistic people create shared understanding
Source: PubMed Central journal article supplement (PMC6512057; doi:10.1177/1362361318785172), 2018-08-03

### Supplementary file 3

**Table 3**

Mean and standard deviations of intersubjective dimensions

| Interaction | Coherence<br>Mean (S.D.) | Affect<br>Mean (S.D.) | Symmetry<br>Mean (S.D.) |
|-------------|--------------------------|-----------------------|-------------------------|
| 1           | 0.23 (0.91)              | 0.25 (0.64)           | 0.33 (0.67)             |
| 2           | 0.18 (0.90)              | 0.41 (0.60)           | 0.48 (0.55)             |
| 3           | 0.49 (0.79)              | 0.16 (0.54)           | 0.35 (0.63)             |
| 4           | 0.36 (0.85)              | -0.14 (0.65)          | 0.11 (0.75)             |
| 5           | 0.31 (0.88)              | 0.09 (0.61)           | 0.25 (0.65)             |
| 6           | 0.34 (0.87)              | 0.08 (0.47)           | 0.44 (0.65)             |
| 7           | 0.31 (0.93)              | 0.24 (0.51)           | 0.35 (0.66)             |
| 8           | 0.19 (0.83)              | 0.04 (0.58)           | 0.13 (0.67)             |
| 9           | 0.22 (0.93)              | 0.15 (0.60)           | 0.26 (0.68)             |
| 10          | 0.13 (0.90)              | 0.09 (0.67)           | 0.48 (0.60)             |
| 11          | 0.48 (0.82)              | 0.36 (0.56)           | 0.53 (0.57)             |
| 12          | 0.44 (0.82)              | 0.25 (0.49)           | 0.46 (0.63)             |
| 13          | 0.44 (0.68)              | 0.33 (0.47)           | 0.35 (0.60)             |
| 14          | 0.33 (0.85)              | 0.41 (0.60)           | 0.36 (0.59)             |
| 15          | 0.34 (0.51)              | 0.50 (0.43)           | 0.18 (0.57)             |
| 16          | 0.39 (0.60)              | 0.38 (0.46)           | 0.39 (0.55)             |
| 17          | 0.45 (0.81)              | 0.16 (0.45)           | 0.39 (0.62)             |
| 18          | 0.41 (0.87)              | 0.37 (0.51)           | 0.42 (0.58)             |
| 19          | 0.41 (0.79)              | 0.23 (0.50)           | 0.21 (0.70)             |
| 20          | 0.24 (0.86)              | 0.36 (0.60)           | 0.25 (0.66)             |

**Table 4**

20-turn average highs and lows

| Interaction | Coherence |      | Affect |      | Symmetry |      |
|-------------|-----------|------|--------|------|----------|------|
|             | Min       | Max  | Min    | Max  | Min      | Max  |
| 1           | -0.30     | 0.70 | -0.30  | 0.65 | -0.30    | 0.70 |
| 2           | -0.45     | 0.72 | -0.46  | 0.70 | 0.05     | 1.00 |
| 3           | -0.20     | 1.00 | -0.28  | 0.55 | 0.05     | 0.85 |
| 4           | -0.38     | 0.94 | -0.39  | 0.45 | -0.45    | 0.56 |
| 5           | -0.40     | 0.75 | -0.39  | 0.60 | -0.16    | 0.70 |
| 6           | -0.16     | 0.90 | -0.23  | 0.40 | 0.00     | 0.80 |
| 7           | -0.17     | 1.00 | -0.05  | 0.59 | 0.10     | 0.91 |
| 8           | -0.18     | 0.64 | -0.58  | 0.47 | -0.13    | 0.47 |
| 9           | -0.50     | 0.80 | -0.26  | 0.80 | -0.20    | 0.80 |
| 10          | -0.55     | 1.00 | -0.78  | 0.63 | 0.00     | 0.79 |
| 11          | -0.21     | 1.00 | 0.00   | 0.76 | 0.00     | 0.81 |
| 12          | -0.15     | 1.00 | 0.00   | 0.60 | 0.05     | 0.88 |
| 13          | -0.11     | 1.00 | 0.00   | 0.68 | -0.26    | 0.78 |
| 14          | -0.27     | 0.87 | -0.21  | 0.78 | 0.00     | 0.63 |
| 15          | -0.10     | 0.75 | -0.05  | 0.74 | -0.20    | 0.55 |
| 16          | -0.39     | 0.75 | 0.05   | 0.60 | -0.35    | 0.80 |
| 17          | -0.15     | 1.00 | -0.13  | 0.60 | 0.05     | 0.80 |
| 18          | -0.20     | 0.85 | 0.00   | 0.75 | -0.08    | 0.65 |
| 19          | -0.10     | 0.80 | -0.05  | 0.50 | -0.75    | 0.80 |
| 20          | -0.54     | 0.94 | -0.25  | 0.77 | -0.41    | 0.82 |

*Note.* Across all interactions, all dimensions had 20 turns with a max score greater than +0.4 and a min score lower than +0.1.

**Figure 3**

Mean scores for coordination dimensions (with standard deviation bars around the mean)

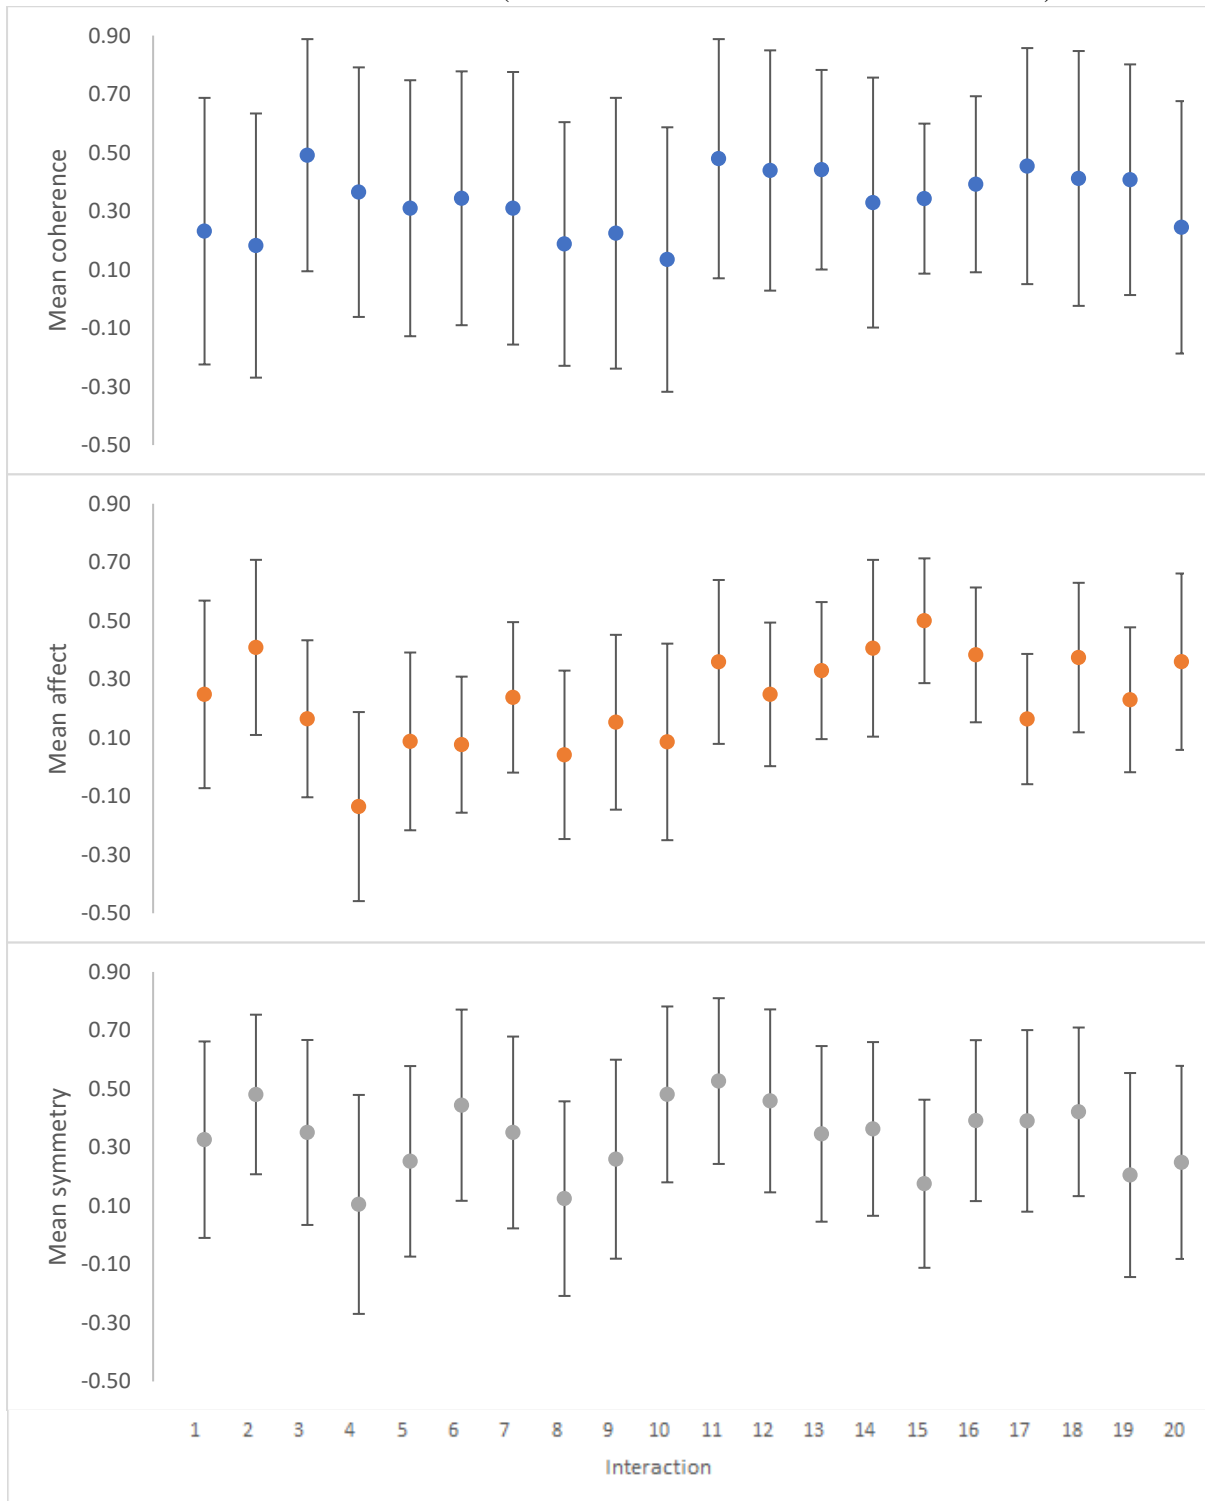

Supplement: AUT785172_Supplementary_file_3.pdf [file AUT785172_Supplementary_file_3.pdf]
