# Supplementary material for: Neurodivergent intersubjectivity: Distinctive features of how autistic people create shared understanding
Source: PubMed Central journal article supplement (PMC6512057; doi:10.1177/1362361318785172), 2018-08-03
Supplement: AUT785172_Supplementary_file_1.pdf [file AUT785172_Supplementary_file_1.pdf]

## Supplementary file 1

**Table 2**

Transcription Conventions adapted from (Markee, 2015)

---

|             |                                                                                                                                                         |
|-------------|---------------------------------------------------------------------------------------------------------------------------------------------------------|
| .           | Period indicates a falling, or final, intonation contour, not necessarily the end of a sentence.                                                        |
| ?           | Question mark indicates rising intonation, not necessarily a question.                                                                                  |
| ,           | Comma indicates “continuing” intonation, not necessarily a clause boundary.                                                                             |
| ↑↓          | Upward and downward pointing arrows indicate marked rising and falling shifts in intonation                                                             |
| :::         | Colons indicate stretching of the preceding sound, proportional to the number of colons                                                                 |
| -           | A hyphen after a word or a part of a word indicates a cut-off or self-interruption with level pitch                                                     |
| <u>word</u> | Underlining indicates stress or emphasis.                                                                                                               |
| WOrd        | Upper case indicates loudness.                                                                                                                          |
| °word°      | Degree signs enclose whispered speech                                                                                                                   |
| =           | Equal sign indicate no break or delay between the words thereby connected.                                                                              |
| <word>      | Indicates slowed down delivery relative to surrounding talk                                                                                             |
| >word<      | Indicates speeded up delivery relative to surrounding talk                                                                                              |
| (( ))       | Double parentheses enclose descriptions of conduct.                                                                                                     |
| (word)      | When all or part of an utterance is in parentheses, this indicates uncertainty on the transcriber’s part.                                               |
| ()          | Empty parentheses indicate that something is being said, but no hearing can be achieved.                                                                |
| (1.2)       | Numbers in parentheses indicate silence in tenths of a second.                                                                                          |
| (.)         | A dot in parentheses indicated a “micropause,” hearable but not readily measurable.                                                                     |
| [           | Separate left square brackets, one above the other on two successive lines with utterances by different speakers, indicates a point of overlap onset.   |
| ]           | Separate right square brackets, one above the other on two successive lines with utterances by different speakers, indicates a point of overlap ending. |
| ...         | Ellipsis                                                                                                                                                |
| (-)         | Indicates unintelligible speech, each dash pertains to a syllable.                                                                                      |

---

Markee, N. (2015). Appendix Transcription Conventions in Conversation Analysis. *The Handbook of Classroom Discourse and Interaction*, 527–528. <http://doi.org/10.1002/9781118531242.app1>
