# Supplementary material for: Neurodivergent intersubjectivity: Distinctive features of how autistic people create shared understanding
Source: PubMed Central journal article supplement (PMC6512057; doi:10.1177/1362361318785172), 2018-08-03
Supplement: AUT785172_Supplementary_file_4.pdf [file AUT785172_Supplementary_file_4.pdf]

## Supplementary file 4

**Table 5**

Frequency of different voices (i.e. when the players assume a voice markedly different from their own) in the data sampled.

| Voice type                           | Frequency | Reciprocated* | % Reciprocated |
|--------------------------------------|-----------|---------------|----------------|
| Player's avatar                      | 115       | 81            | 70%            |
| Fictional voices (TV/film/comics)    | 50        | 26            | 52%            |
| Accents/dialects                     | 33        | 13            | 39%            |
| Game AI                              | 24        | 15            | 63%            |
| unknown voice                        | 24        | 13            | 54%            |
| Narrator                             | 19        | 12            | 63%            |
| Miscellaneous**                      | 19        | 14            | 73%            |
| Social voices (other players/family) | 12        | 10            | 83%            |
| Music lyric                          | 12        | 4             | 33%            |
| Total                                | 308       | 188           |                |

\*Reciprocated = instances where voices, in the next turn, are responded to in terms of coherence, affect or symmetry.

\*\*Miscellaneous = Instances of voices that were very infrequent and did not belong to any other categories. These included idioms, anthropomorphising the voice of the Xbox console itself, sound effects and musical jingles.

**Figure 4**

Distribution of voicing across interactions\*

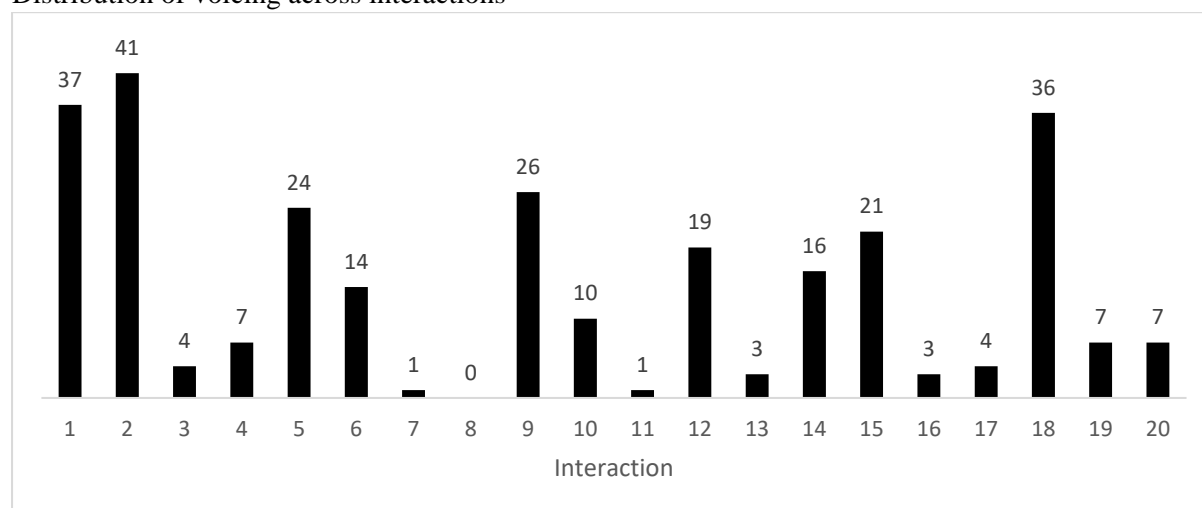

\*This figure shows the distribution of voicing frequency (i.e. when the players assume a voice markedly different from their own) across all interactions.
